# Supplementary material
Source: PubMed Central journal article supplement (PMC5278809)
Supplement: Supp_Fig2.pdf [file Supp_Fig2.pdf]

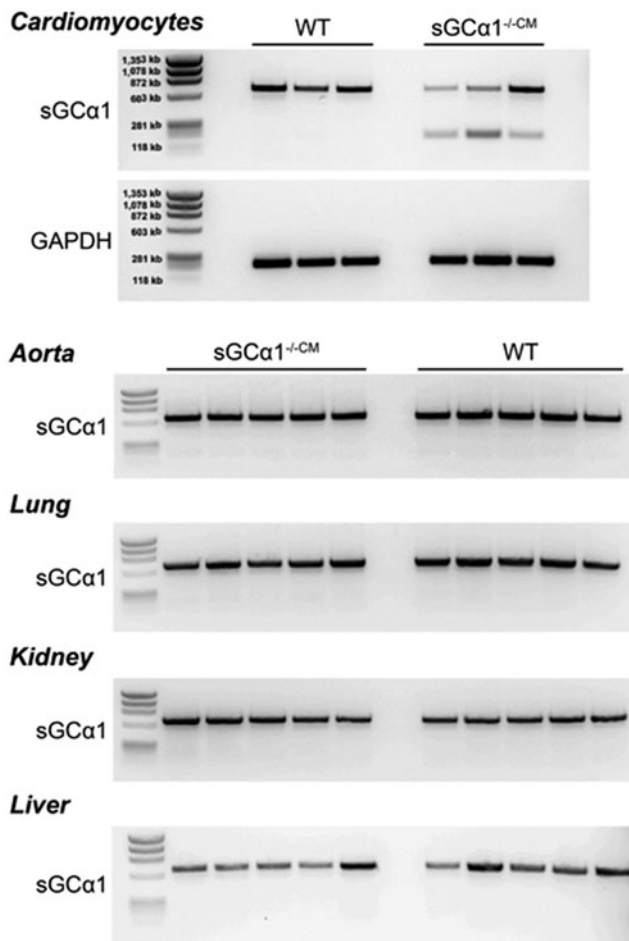

**SUPPLEMENTARY FIG. S2. Exon 6 of *sGCα1* deleted in *sGCα1<sup>-/-CM</sup>* cardiomyocytes, but not other organ tissues.** PCR analysis of *sGCα1* mRNA expression, using a forward primer binding in exon 5 and a reverse primer binding in exon 7, demonstrated the presence of a truncated *sGCα1* PCR product in cardiomyocytes isolated from *sGCα1<sup>-/-CM</sup>* mice as a result of Cre recombinase-mediated deletion of exon 6. This deletion was not observed in mRNA extracted from aorta, lung, kidney, and liver. PCR, polymerase chain reaction; *sGCα1<sup>-/-CM</sup>*, mice with cardiomyocyte-specific deletion of exon 6 of the *sGCα1* allele.
