# Supplementary material
Source: PubMed Central journal article supplement (PMC5278809)
Supplement: Supp_Table1.pdf [file Supp_Table1.pdf]

SUPPLEMENTARY TABLE S1. SIMILAR LEFT VENTRICULAR FUNCTION AND DIMENSIONS IN  $sGC\alpha1^{-/-CM}$  AND WILD-TYPE MICE UNDER BASELINE CONDITIONS

| <i>Echocardiography</i> | <i>WT (n=21)</i> | <i>sGC<math>\alpha1^{-/-CM}</math> (n=20)</i> | <i>p-Value</i> |
|-------------------------|------------------|-----------------------------------------------|----------------|
| LVID <sub>ES</sub> (mm) | 1.3 ± 0.01       | 1.3 ± 0.02                                    | 0.40           |
| LVID <sub>ED</sub> (mm) | 3.1 ± 0.03       | 3.1 ± 0.03                                    | 0.99           |
| IVS <sub>ED</sub> (mm)  | 0.98 ± 0.02      | 0.98 ± 0.01                                   | 0.94           |
| LVPW <sub>ED</sub> (mm) | 1.01 ± 0.01      | 1.01 ± 0.01                                   | 0.98           |
| FS (%)                  | 57 ± 0.3         | 57 ± 0.3                                      | 0.26           |
| HR (bpm)                | 550 ± 9          | 542 ± 16                                      | 0.97           |

bpm, beats per minute; FS, fractional shortening; HR, heart rate; IVS<sub>ED</sub>, interventricular septal thickness at end-diastole; LVID<sub>ED</sub>, left ventricular end-diastolic internal diameter; LVID<sub>ES</sub>, left ventricular end-systolic internal diameter; LVPW<sub>ED</sub>, left ventricular posterior wall thickness at end-diastole; sGC, soluble guanylate cyclase;  $sGC\alpha1^{-/-CM}$ , mice with cardiomyocyte-specific deletion of exon 6 of the  $sGC\alpha1$  allele; WT, wild-type.
