# Supplementary material
Source: PubMed Central journal article supplement (PMC5278809)
Supplement: Supp_Table2.pdf [file Supp_Table2.pdf]

SUPPLEMENTARY TABLE S2. SIMILAR LEFT VENTRICULAR FUNCTION AND DIMENSIONS IN DN $sGC\alpha 1^{tg/+}$  AND WILD-TYPE MICE UNDER BASELINE CONDITIONS

| <i>Echocardiography</i> | <i>WT (n = 14)</i> | <i>DN<math>sGC\alpha 1^{tg/+}</math> (n = 12)</i> | <i>p-Value</i> |
|-------------------------|--------------------|---------------------------------------------------|----------------|
| LVID <sub>ES</sub> (mm) | 2.1 ± 0.04         | 2.2 ± 0.05                                        | 0.16           |
| LVID <sub>ED</sub> (mm) | 3.2 ± 0.05         | 3.4 ± 0.08                                        | 0.08           |
| IVS <sub>ED</sub> (mm)  | 0.79 ± 0.01        | 0.77 ± 0.01                                       | 0.35           |
| LVPW <sub>ED</sub> (mm) | 0.86 ± 0.01        | 0.86 ± 0.01                                       | 0.53           |
| FS (%)                  | 35 ± 1.4           | 35 ± 1.3                                          | 0.69           |
| HR (bpm)                | 437 ± 7            | 431 ± 7                                           | 0.68           |

DN $sGC\alpha 1^{tg/+}$ , mice with cardiomyocyte-specific expression of a dominant negative mutation of  $sGC\alpha 1$ .
