# Supplementary material
Source: PubMed Central journal article supplement (PMC5278809)
Supplement: Supp_Table3.pdf [file Supp_Table3.pdf]

SUPPLEMENTARY TABLE S3. SIMILAR DOXORUBICIN-INDUCED DECREASE IN NORMALIZED HEART WEIGHT IN SGC $\alpha$ 1-DEFICIENT AND WILD-TYPE MICE AFTER 12 WEEKS OF DOXORUBICIN TREATMENT

|                                               | <i>WT+ saline</i><br>(n=5)  | <i>sGC<math>\alpha</math>1<sup>-/-CM</sup>+ saline</i><br>(n=7)  | <i>WT+ DOX</i><br>(n=11) | <i>sGC<math>\alpha</math>1<sup>-/-CM</sup>+ DOX</i><br>(n=7)  |
|-----------------------------------------------|-----------------------------|------------------------------------------------------------------|--------------------------|---------------------------------------------------------------|
| Heart weight-to-tibia<br>length ratio (mg/mm) | 7.0 $\pm$ 0.2               | 6.7 $\pm$ 0.3                                                    | 5.3 $\pm$ 0.1*           | 5.5 $\pm$ 0.3*                                                |
|                                               | <i>WT+ saline</i><br>(n=13) | <i>DNsGC<math>\alpha</math>1<sup>tg/+</sup>+ saline</i><br>(n=5) | <i>WT+ DOX</i><br>(n=6)  | <i>DNsGC<math>\alpha</math>1<sup>tg/+</sup>+ DOX</i><br>(n=7) |
| Heart weight-to-tibia<br>length ratio (mg/mm) | 6.7 $\pm$ 0.3               | 6.7 $\pm$ 0.2                                                    | 5.7 $\pm$ 0.2*           | 5.6 $\pm$ 0.2*                                                |

\* $p < 0.05$  versus saline.  
DOX, doxorubicin.
